# Supplementary material for: Development of circulating cell-free DNA reduced representation bisulfite sequencing for clinical methylomics diagnostics
Source: bioRxiv or medRxiv preprint supplement (doi:10.1101/663195), 2025-09-08
Supplement: Supplementary file [file media-2.pdf]

```

#####
#####Supplementary code to raw data#####
#####

#####
#####Moving the files#####
#####

#in a folder `methylation analysis/':
#download the untrimmed, but demultiplexed file from Belnet
(Nucleomics core): expXXX.tar.gz
#move the tar.gz-file with WinSCP to the unix environment
#unzip and untar the tar.gz-file
#tar -zxvf expXXX.tar.gz
tar -zxvf exp2802-NextSeq_High_output_24libs.tar.gz

#make directories per library
(date_method_patient_DNA_repeat_i(indexnr)) and copy the
paired-end reads from all lanes to the directories
mkdir 20171012_cfRRBS_uzg013_cfDNA_1_i2
mv RRBS02_S2_L001_R1_001.fastq.gz RRBS02_S2_L002_R1_001.fastq.gz
RRBS02_S2_L003_R1_001.fastq.gz RRBS02_S2_L004_R1_001.fastq.gz
RRBS02_S2_L001_R2_001.fastq.gz RRBS02_S2_L002_R2_001.fastq.gz
RRBS02_S2_L003_R2_001.fastq.gz RRBS02_S2_L004_R2_001.fastq.gz
20171012_cfRRBS_uzg013_cfDNA_1_i2

#go to directory
cd 20171012_cfRRBS_uzg013_cfDNA_1_i2

#concatenate the reads from all lanes
cat RRBS02_S2_L001_R1_001.fastq.gz RRBS02_S2_L002_R1_001.fastq.gz
RRBS02_S2_L003_R1_001.fastq.gz RRBS02_S2_L004_R1_001.fastq.gz >
20171012_i2_R1.fastq.gz
cat RRBS02_S2_L001_R2_001.fastq.gz RRBS02_S2_L002_R2_001.fastq.gz
RRBS02_S2_L003_R2_001.fastq.gz RRBS02_S2_L004_R2_001.fastq.gz >
20171012_i2_R2.fastq.gz

#remove the reads-per-lane files
rm RRBS02_S2_L001_R1_001.fastq.gz RRBS02_S2_L002_R1_001.fastq.gz
RRBS02_S2_L003_R1_001.fastq.gz RRBS02_S2_L004_R1_001.fastq.gz
rm RRBS02_S2_L001_R2_001.fastq.gz RRBS02_S2_L002_R2_001.fastq.gz
RRBS02_S2_L003_R2_001.fastq.gz RRBS02_S2_L004_R2_001.fastq.gz

#####
#####extra code: Crop and/or downsample raw reads#####
#####

#Environment:
#Seqtk v1.2-r101

#to compare performance between 2 methods, sometimes the amount of
reads had to be downsampled. S2 = random seed 2
seqtk sample -s2 ../20171012_i2_R1.fastq.gz 100000 >
20171012_i2_R1_1M.fastq
seqtk sample -s2 ../20171012_i2_R2.fastq.gz 100000 >
20171012_i2_R2_1M.fastq

#SeqCapEpi samples were sequenced on a HiSeq4000 PE150, but
optimally they should have been sequenced PE100, so the raw
(downsampled) raw reads are cropped to 100bp
seqtk trimfq -L 100 20180615_i2_R1_1M.fastq >
20180615_i2_R1_1M_crop100.fastq

```

```

seqtk trimfq -L 100 20180615_i2_R2_1M.fastq >
    20180615_i2_R2_1M_crop100.fastq

#seqtk gunzips the files, so they have to be gzipped again
gzip 20180615_i2_R1_1M_crop100.fastq 20180615_i2_R2_1M_crop100.fastq

#####
#####Trimming the reads#####
#####

#Environment:
#trim_galore v0.4.3 script in folder 'methylation_analysis'
#    with dependencies installed (Cutadapt v1.13, FastQC v0.11.5)

#perl ../trim_galore [options] date_i(indexnr)_R1.fastq.gz
    date_i(indexnr)_R2.fastq.gz

#options used:
#    --paired                when trimming PE-libraries
#    --rrbs                  when trimming cfRRBS and RRBS data
#    no --rrbs               when trimming RRBS on cfDNA data,
                             WGBS data and SeqCapEpi data
#    non_directional         when trimming epiGBS data (chapt. 4)
#    --clip_R1 10            when trimming SeqCapEpi data with
                             SWIFT Accel-NGS methyl-kit
#    --clip_R2 10            when trimming SeqCapEpi data with
                             SWIFT Accel-NGS methyl-kit
#    --three_prime_clip_R1 10 when trimming SeqCapEpi data with
                             SWIFT Accel-NGS methyl-kit
#    --three_prime_clip_R2 10 when trimming SeqCapEpi data with
                             SWIFT Accel-NGS methyl-kit
#    --clip_R1 18            when trimming WGBS data with SWIFT
                             Accel-NGS methyl-kit, but seen
                             in fastqc
#    --clip_R2 18            when trimming WGBS data with SWIFT
                             Accel-NGS methyl-kit, but seen
                             in fastqc
#    --three_prime_clip_R1 2 when trimming WGBS data with SWIFT
                             Accel-NGS methyl-kit, but seen
                             in fastqc
#    --three_prime_clip_R2 2 when trimming WGBS data with SWIFT
                             Accel-NGS methyl-kit, but seen
                             in fastqc

perl ../trim_galore --paired --rrbs 20171012_i2_R1.fastq.gz
    20171012_i2_R2.fastq.gz

#output:
20171012_i2_R1_val_1.fq.gz
20171012_i2_R2_val_2.fq.gz
20171012_i2_R1.fastq.gz_trimming_report.txt
20171012_i2_R2.fastq.gz_trimming_report.txt

#rename files
mv 20171012_i2_R1_val_1.fq.gz 20171012_i2_R1_trimmed.fastq.gz
mv 20171012_i2_R2_val_2.fq.gz 20171012_i2_R2_trimmed.fastq.gz
mv 20171012_i2_R1.fastq.gz_trimming_report.txt
    20171012_i2_R1_trimming_report.txt
mv 20171012_i2_R2.fastq.gz_trimming_report.txt
    20171012_i2_R2_trimming_report.txt

```

```

#####
#####Bisulfite converting the reference genome#####
#####

#Environment:
#bismark v0.17.0 folder in 'methylation_analysis/'
#download 'hg19.fa' and put in folder 'hg19/'
#download 'lambda.fa' and put in folder 'lambda/'
#bowtie2 v2.3.2

#only need to do this once
bismark_v0.17.0/bismark_genome_preparation --verbose --bowtie2 hg19/

#or the lambda/ genome
bismark_v0.17.0/bismark_genome_preparation --verbose --bowtie2
lambda/

#####
#####Read mapping#####
#####

#Environment:
#bismark v0.17.0 folder in 'methylation_analysis/'

#../bismark v0.17.0/bismark [options] --genome_folder ../hg19/ (or
lambda/) -1 20171012_i2_R1_trimmed.fastq.gz -2
20171012_i2_R2_trimmed.fastq.gz

#options used:
# --un to keep the unmapped reads (only
needed when mapping to hg19)
# --ambiguous to keep the ambiguous mapped reads
(only needed when mapping to
hg19)
# --ambig_bam to map the amiguous mapped reads,
random assignment to one of the
possible mapping sites (only
needed when mapping to hg19)
# --non_directional when working with epiGBS reads
(chapt.4)

../bismark_v0.17.0/bismark --genome_folder ../hg19/ --un --ambiguous
--ambig_bam -1 20171012_i2_R1_trimmed.fastq.gz -2
20171012_i2_R2_trimmed.fastq.gz

#output:
20171012_i2_R1_trimmed_bismark_bt2_pe.bam
20171012_i2_R1_trimmed_bismark_bt2_pe.ambig.bam
20171012_i2_R1_trimmed_bismark_bt2_PE_report.txt
20171012_i2_R1_trimmed.fastq.gz_ambiguous_reads_1.fq.gz
20171012_i2_R2_trimmed.fastq.gz_ambiguous_reads_2.fq.gz
20171012_i2_R1_trimmed.fastq.gz_unmapped_reads_1.fq.gz
20171012_i2_R2_trimmed.fastq.gz_unmapped_reads_2.fq.gz

#rename the files, because when mapping to lambda next, the files
get the same name
mv 20171012_i2_R1_trimmed_bismark_bt2_pe.bam
20171012_i2_mapping_hg19.bam
mv 20171012_i2_R1_trimmed_bismark_bt2_pe.ambig.bam
20171012_i2_mapping_hg19_ambig.bam

```

```

mv 20171012_i2_R1_trimmed_bismark_bt2_PE_report.txt
   20171012_i2_mapping_hg19_report.txt
mv 20171012_i2_R1_trimmed.fastq.gz_ambiguous_reads_1.fq.gz
   20171012_i2_R1_ambiguous_reads.fastq.gz
mv 20171012_i2_R2_trimmed.fastq.gz_ambiguous_reads_2.fq.gz
   20171012_i2_R2_ambiguous_reads.fastq.gz
mv 20171012_i2_R1_trimmed.fastq.gz_unmapped_reads_1.fq.gz
   20171012_i2_R1_unmapped_reads.fastq.gz
mv 20171012_i2_R2_trimmed.fastq.gz_unmapped_reads_2.fq.gz
   20171012_i2_R2_unmapped_reads.fastq.gz

#####
#####Extract methylation data#####
#####

#Environment:
#bismark v0.17.0 folder in `methylation_analysis/'

#../bismark v0.17.0/bismark_methylation_extractor [options]
   20171012_i2_mapping_hg19.bam

#options used:
#   -p                when working with paired-end data
#   -s                when working with single-end data
#   --ignore_r2 2    rrbs paired end
#   --comprehensive  Specifying this option will merge all
                    four possible strand-specific
                    methylation info into context-
                    dependent output files. The default
                    contexts are: CpG context, CHG
                    context, CHH context
#   --merge_non_CpG This will produce two output files (in --
                    comprehensive mode) or eight strand-
                    specific output files (default) for
                    Cs in CpG context and non-CpG
                    context
#   --bedGraph        needed for option --cytosine_report
#   --cytosine_report outputs percent methylation, methylated
                    count and unmethylated count per
                    covered CpG
#   --genome_folder hg19\ (or lambda\) needed for option --
                    cytosine_report

../bismark v0.17.0/bismark_methylation_extractor -p --ignore_r2 2 --
comprehensive --merge_non_CpG --bedGraph --cytosine_report --
genome_folder ../hg19/ 20171012_i2_mapping_hg19.bam

#output:
20171012_i2_mapping_hg19.bedGraph.gz
20171012_i2_mapping_hg19.bismark.cov.gz
20171012_i2_mapping_hg19.CpG_report.txt
20171012_i2_mapping_hg19.M-bias.txt
20171012_i2_mapping_hg19_splitting_report.txt
CpG_context_20171012_i2_mapping_hg19.txt
Non_CpG_context_20171012_i2_mapping_hg19.txt

#remove the files we do not need
rm 20171012_i2_mapping_hg19.bedGraph.gz
rm CpG_context_20171012_i2_mapping_hg19.txt
rm Non_CpG_context_20171012_i2_mapping_hg19.txt
rm 20171012_i2_mapping_hg19.CpG_report.txt

```

```
#keep and rename the ones needed (not necessary but when testing
  other parameters the original files would be overwritten when
  name was not changed)
mv 20171012_i2_mapping_hg19.bismark.cov.gz 20171012_i2_hg19.cov.gz
mv 20171012_i2_mapping_hg19.M-bias.txt 20171012_i2_hg19_M-bias.txt
mv 20171012_i2_mapping_hg19_splitting_report.txt
  20171012_i2_hg19_splitting_report.txt

#QC
../bismark_v0.17.0/bismark2report --alignment_report
  20171012_i2_mapping_hg19_report.txt --splitting_report
  20171012_i2_hg19_splitting_report.txt --mbias_report
  20171012_i2_hg19_M-bias.txt

#output:
20171012_i2_mapping_hg19_report.html

#once html-report is generated, M-bias file and splitting_report can
  be removed
rm 20171012_i2_hg19_splitting_report.txt
rm 20171012_i2_hg19_M-bias.txt
```

```
#####  
#####Supplementary code to generate genome tracks#####  
#####
```

```
#####  
#####Generation of CPG tracks#####  
#####
```

```
#Environment:  
#R v3.4.1  
#Bioconductor v3.6  
#BiocInstaller v1.28.0  
#BSgenome.Hsapiens.UCSC.hg19 v1.4.0  
#Biostrings v2.47.0  
#rtracklayer v1.38.2  
#HiTC v1.22.0  
#Bedtools v2.25.0  
#Awk v4.0.2
```

R

```
source("http://bioconductor.org/biocLite.R")  
biocLite("BSgenome.Hsapiens.UCSC.hg19")  
library(BSgenome.Hsapiens.UCSC.hg19)  
library(Biostrings)  
  
Chrs<-paste("chr",c(1:22,"X","Y","M"),sep="")  
CpGpos<-lapply(Chrs,function(x) {  
  RES<-matchPattern("CG",Hsapiens[[x]])  
  RES<-cbind(rep(x,length(RES)),RES@ranges@start)  
  return(RES)})  
CpGpos<-do.call("rbind",CpGpos)  
CpGstartend<-cbind(CpGpos[,1],as.numeric(CpGpos[,2])-  
  1,as.numeric(CpGpos[,2]))  
CpGstartendas.data.frame(CpGstartend,stringsAsFactors=F)  
CpGstartend[,2]<-as.numeric(CpGstartend[,2])  
CpGstartend[,3]<-as.numeric(CpGstartend[,3])  
write.table(CpGstartend,file="CpGhg19.bed",sep="\t",quote=F,  
  col.names=F,row.names=F)
```

q()

```
#####  
#####Generation of MspI tracks#####  
#####
```

R

```
source("http://bioconductor.org/biocLite.R")  
biocLite("BSgenome.Hsapiens.UCSC.hg19")  
biocLite("HiTC")  
library(BSgenome.Hsapiens.UCSC.hg19)  
library(Biostrings)  
require(HiTC)  
require(rtracklayer)  
  
human_chr <- seqlevels(BSgenome.Hsapiens.UCSC.hg19)[1:25]  
resFrag <- getRestrictionFragmentsPerChromosome(resSite="CCGG",  
  chromosomes = human_chr, overhangs5 = 2, genomePack =  
  "BSgenome.Hsapiens.UCSC.hg19")  
allRF <- do.call("c", resFrag)
```

```

names(allRF)<-unlist(sapply(resFrag, function(x)
  {paste0("HIC_",seqlevels(x),"_",1:length(x))}))
export(allRF, format="bed", con="MspI_resFrag_hg19.bed")

q()

awk '{$2=$2-1;$3=$3+1;print}' MspI_resfrag_hg19.bed >
  MspI_hg19_all.bed
sed -i 's/-1/0/g' MspI_hg19_all.bed
perl -p -i -e 's/ /\t/g' MspI_hg19_all.bed
rm MspI-resfrag_hg19.bed

#####
#####Extra#####
#####

#Generation of the 20-165bp MspI track
#22-167 because a MspI-track is defined as CGNNN...NNNCCG, 20-165
  would be needed if MspI-track was defined as GGNNN...NNNCC
awk '$3-$2 >= 22 && $3-$2 <= 167' MspI_hg19_all.bed >
  MspI_hg19_22_167.bed

#Generation of the CpG's in the 20-165bp MspI track
bedtools intersect -u -a CpGhg19.bed -b MspI_hg19_22_167.bed >
  CpG_in_MspI_22_167

#CpG's in the SeqCapEpi track (downloaded from Roche website)
130912_HG19_CpGiant_4M_EPI_CpG.bed

#CancerLocator track (downloaded from paper and keep column 2,3,4)
awk '{print($2"\t"$3"\t"$4)}' cpg_clusters_boundaries.tsv >
  cpg_clusters_boundaries.bed

```

```
#####  
#####Supplementary_code MspI enrichment#####  
#####
```

```
#code to generate Figure 1c  
#count unique mapped reads that overlap with MspI-track. Read has to  
# lie completely within the MspI-track and the MspI-fragment has  
# to be covered for 11.976%  
#11.976% is the fraction of the shortest read, 20bp, divided by the  
# longest expected MspI-fragment, 165bp+2bp.  
#2bp due to the fact MspI-fragments are defined as CGG---CCG  
#bin MspI-fragments per 2 lengths: 20&21, 22&23, ... and sum the  
# amount of reads hitting the bins
```

```
bedtools coverage -counts -f 0.11976 -F 1 -a  
  ../Tracks/MspI_hg19_all.bed -b 20170210_i2_mapping_hg19.bam >  
  intermediate_result1  
awk '{print $1"\t"$2"\t"$3"\t"$3-$2"\t"$4}' intermediate_result1 >  
  intermediate_result2  
awk '$5>=1' intermediate_result2 > intermediate_result3  
awk '{  
  BIN=sprintf("%d", $4*(1/BINSIZE))+0;  
  DATA[BIN]=DATA[BIN]+$5;  
  if((!MIN)|| (MIN>BIN)) MIN=BIN;  
  if((!MAX)|| (MAX<BIN)) MAX=BIN;  
  }  
  END {  
  for(BIN=MIN; BIN<=MAX; BIN++)  
  print((BIN*BINSIZE) "\t" (BIN*BINSIZE)+(BINSIZE-1) "\t" DATA[BIN]);  
  }' BINSIZE=2 intermediate_result3 >  
  20170210_i2_hg19_reads_hitting_MspI
```

```
rm intermediate_result1 intermediate_result2 intermediate_result3
```

```
#in excel: copy table and divide by total unique mapping reads  
and plot
```

```
#also in excel: plot performance, copied from reports:  
20171012_i2_R2_trimming_report.txt  
20171012_i2_mapping_hg19_report.txt  
20171012_i2_mapping_lambda_report.txt
```



```
#####  
#####Supplementary_code CpG coverage#####  
#####
```

#Figure 2 b

#For cf-RRBS libraries, calculate the amount of CpGs in the MspI-  
target are hit by how many reads, when starting from  
downsampled 1M raw reads

#repeat for 2M, 4M, 8M, 16M

```
bedtools intersect -wo -a ../Tracks/CpG_in_MspI_22_167.bed -b  
20171012_i11_R1_1M_val_1_bismark_bt2_pe.bismark.cov.gz >  
intermediate_result
```

```
bedtools groupby -i intermediate_result -g 1,2,3 -c 8,9 -o sum >  
20171012_i11_1M_CpG_in_hg19
```

```
awk '{s+=(($4+$5)>=1)}END{print s}' 20171012_i11_1M_CpG_in_hg19 >>  
sum
```

```
awk '{s+=(($4+$5)>=10)}END{print s}' 20171012_i11_1M_CpG_in_hg19 >>  
sum
```

#For SeqCapEpi libraries, calculate the amount of CpGs in the  
SeqCapEpi target are hit by how many reads, when starting from  
downsampled 1M raw reads

#repeat for 2M, 4M, 8M, 16M

```
bedtools intersect -wo -a  
../Tracks/130912_HG19_CpGiant_4M_EPI_CpG.bed -b  
20180615_i14_R1_1M_crop100_val_1_bismark_bt2_pe.bismark.cov.gz  
> intermediate_result
```

```
bedtools groupby -i intermediate_result -g 1,2,3 -c 11,12 -o sum >  
20180615_i14_1M_crop100_CpG_in_hg19
```

```
awk '{s+=(($4+$5)>=1)}END{print s}'  
20180615_i14_1M_crop100_CpG_in_hg19 >> sum
```

```
awk '{s+=(($4+$5)>=10)}END{print s}'  
20180615_i14_1M_crop100_CpG_in_hg19 >> sum
```

#in excel: plot

#For cf-RRBS libraries, extract the CpG's in the MspI-target that  
are covered by >=10 sequencing reads. Starting from 8M PE75  
reads or 0.6Gbp raw data

#repeat on the 3 technical repeats

```
bedtools intersect -wo -a ../Tracks/CpG_in_MspI_22_167.bed -b  
20171012_i16_R1_8M_val_1_bismark_bt2_pe.bismark.cov.gz >  
intermediate_result
```

```
bedtools groupby -i intermediate_result -g 1,2,3 -c 8,9 -o sum >  
20171012_i16_8M_CpG_in_hg19
```

```
awk '($4+$5)>=10' 20171012_i16_8M_CpG_in_hg19 >  
20171012_i16_8M_CpG_in_hg19_10
```

#For SeqCapEpi libraries, extract the CpG's in the SeqCapEpi-target  
that are covered by >=10 sequencing reads. Starting from 6M  
PE100 reads or 0.6Gbp raw data

#repeat on the 3 technical repeats

```
bedtools intersect -wo -a  
../Tracks/130912_HG19_CpGiant_4M_EPI_CpG.bed -b  
20180615_i13_R1_6M_crop100_val_1_bismark_bt2_pe.bismark.cov.gz  
> intermediate_result
```

```
bedtools groupby -i intermediate_result -g 1,2,3 -c 11,12 -o sum >  
20180615_i13_6M_crop100_CpG_in_hg19
```

```

awk '($4+$5)>=10' 20180615_i13_6M_crop100_CpG_in_hg19 >
20180615_i13_6M_crop100_CpG_in_hg19_10

#Make a three-way intersection of the three cf-RRBS technical
repeats and for the three SeqCapEpi technical repeats
bedtools multiinter -i
../20170210_cfRRBS_uzg002_cfdNA_1_i6/20170210_i6_8M_CpG_
in hg19_10
../20171012_cfRRBS_uzg009_cfdNA_2_i11/20171012_i11_8M_CpG
in hg19_10
../20171012_cfRRBS_uzg009_cfdNA_3_i16/20171012_i16_8M_CpG_
in hg19_10 >
Multiinter_8M_CpG_20170210_i6_20171012_i11_20171012_i16

bedtools multiinter -i
../20180615_SeqCapEpi_uzg009_cfdNA_1_i12/20180615_i12_6M_
crop100_CpG_in hg19_10
../20180615_SeqCapEpi_uzg009_cfdNA_2_i13/20180615_i13_6M_
crop100_CpG_in hg19_10
../20180615_SeqCapEpi_uzg009_cfdNA_3_i14/20180615_i14_6M_
crop100_CpG_in hg19_10 >
Multiinter_6M_crop100_CpG_20180615_i12_20180615_i13_20180615_
i14

#Calculate all intersections of a Venn diagram for cf-RRBS and
SeqCapEpi and do this for the CpG's and the CancerLocator-
clusters
awk '{s+=$5=="1"}END{print $5,s}'
Multiinter_8M_CpG_20170210_i6_20171012_i11_20171012_i16 >>
Venn_cfRRBS_output
awk '{s+=$5=="2"}END{print $5,s}'
Multiinter_8M_CpG_20170210_i6_20171012_i11_20171012_i16 >>
Venn_cfRRBS_output
awk '{s+=$5=="1,2"}END{print $5,s}'
Multiinter_8M_CpG_20170210_i6_20171012_i11_20171012_i16 >>
Venn_cfRRBS_output
awk '{s+=$5=="3"}END{print $5,s}'
Multiinter_8M_CpG_20170210_i6_20171012_i11_20171012_i16 >>
Venn_cfRRBS_output
awk '{s+=$5=="1,3"}END{print $5,s}'
Multiinter_8M_CpG_20170210_i6_20171012_i11_20171012_i16 >>
Venn_cfRRBS_output
awk '{s+=$5=="2,3"}END{print $5,s}'
Multiinter_8M_CpG_20170210_i6_20171012_i11_20171012_i16 >>
Venn_cfRRBS_output
awk '{s+=$5=="1,2,3"}END{print $5,s}'
Multiinter_8M_CpG_20170210_i6_20171012_i11_20171012_i16 >>
Venn_cfRRBS_output

#Make Venn-diagrams in Python for cf-RRBS and SeqCapEpi
#open python
python3.6

#import needed packages
import matplotlib
matplotlib.use('Agg')
import matplotlib.pyplot as plt
import numpy as np
from matplotlib_venn import venn3, venn3_circles

#make weighted venn diagram
plt.figure(figsize=(4,4))

```

```

#subsets=(Abc, aBc, ABc, abC, AbC, aBC, ABC)
v = venn3(subsets=(78370, 54815, 44122, 71567, 45900, 69627,
  298432), set_labels = ('cfRRBS1', 'cfRRBS2', 'cfRRBS3'))
c = venn3_circles(subsets=(78370, 54815, 44122, 71567, 45900, 69627,
  298432))

plt.savefig('Venn_SeqCapEpi_CpG.svg')

quit()

#####

#Figure 2b/c
#Make correlation plots and calculate pearson r-value

#navigate to the mother folder and intersect both files you just
  generated to obtain the CpG's covered by both repeats/methods
bedtools intersect -wo -a
  ../20170210_cfRRBS_uzg009_cfdNA_1_i6/20170210_i6_8M_CpG
  in hg19_10 -b
  ../20171012_cfRRBS_uzg009_cfdNA_2_i11/20171012_i11_8M_CpG_
  in hg19_10 > intermediatel
bedtools intersect -wo -a intermediatel -b
  ../20171012_cfRRBS_uzg009_cfdNA_3_i16/20171012_i16_8M_CpG_
  in hg19_10 > intermediate2
awk '{
  print($1"\t"$2"\t"$3"\t"$4"\t"$5"\t"$4/($4+$5)"\t"$9"\t"$10"\t"
  $9/($9+$10)"\t"$15"\t"$16"\t"$15/($15+$16)} intermediate2 >
  intersect_20170210_i6_20171012_i11_20171012_i16
awk '{print($1"\t"$2"\t"$3"\t"$6"\t"$9"\t"$12)}'
  intersect_20170210_i6_20171012_i11_20171012_i16 >
  intersect_20170210_i6_20171012_i11_20171012_i16_1

rm intermediatel

#Generate correlation plots in python
#open python
python3.6

#load needed packages
import matplotlib
matplotlib.use('Agg')
import matplotlib.pyplot as plt
import matplotlib.patches as mpatches
import numpy as np
import pandas as pd
import seaborn as sns
from scipy.stats import pearsonr
from matplotlib.gridspec import GridSpec
import matplotlib.ticker as ticker

#read the intersection file, make a header
df =
  pd.read_csv('intersect_20170210_i6_20171012_i11_20171012_i16_1'
    , sep="\t", header=None)
df.columns = ["chr", "start", "stop", "prct_meth_i6",
  "prct_meth_i11", "prct_meth_i16"]
X = df["prct_meth_i11"]
Y = df["prct_meth_i16"]

#make a correlation plot
g = sns.JointGrid(X, Y, xlim=[0,1], ylim=[0,1])
g.plot_joint(plt.scatter, color="#43b7ba", s=5)

```

```

g.plot_marginals(sns.distplot, bins = 50, kde=False,
color="#ec672a", hist_kws={'log':True})

plt.setp(g.ax_joint.set_xlabel('rpt2', fontsize = 20),
visible=True)
plt.setp(g.ax_joint.set_ylabel('rpt3', fontsize = 20),
visible=True)

plt.setp(g.ax_joint.get_xticklabels(), fontsize = 15, visible=True)
plt.setp(g.ax_joint.get_yticklabels(), fontsize = 15, visible=True)

plt.setp(g.ax_marg_x.set_ylabel('#CanLoc', fontsize = 20),
visible=True)
plt.setp(g.ax_marg_y.set_xlabel('#CanLoc', fontsize = 20),
visible=True)

plt.setp(g.ax_marg_x.set_yticks([1.e+01, 1.e+03]), visible=True)
plt.setp(g.ax_marg_y.set_xticks([1.e+01, 1.e+03]), visible=True)

plt.setp(g.ax_marg_x.get_yticklabels(), visible=True, fontsize = 15)
plt.setp(g.ax_marg_y.get_xticklabels(), visible=True, fontsize = 15)

plt.setp(g.ax_marg_x.yaxis.get_majorticklines(), visible=True)
plt.setp(g.ax_marg_y.xaxis.get_majorticklines(), visible=True)

g.annotate(pearsonr, template = "r = {val:.2g}", frameon=False,
loc = (-0.2,0.9), fontsize = 20)

plt.tight_layout()
plt.savefig('intersect_cfRRBS_WGBS_sNBLO5.png')

quit()

#similar for SeqCap Epi
#intersect the cf-RRBS intersection file with the SeqCap Epi
intersection file to compare a cf-RRBS repeat with a SeqCap Epi
repeat (fig2c top)
#average the cf-RRBS values and the SeqCap Epi values of the
intersection file of fig2c top before generating the correlation
plot of fig 2c bottom

```

```

## Import libraries
import matplotlib
matplotlib.use('Agg')
import matplotlib.pyplot as plt
plt.switch_backend('Agg')

import glob
import os
import re
import sys, getopt
import numpy as np
import pandas as pd
import seaborn as sns
import subprocess

### BEDtools > 2.27.1 is needed!!
### Tested with py >3.4
### More information about the bed file is at
https://github.com/shulik7/CancerLocator/tree/Add_instruction_and_data

# cFRRBS data
test_folder = "./testfiles/"
test_files = glob.glob(os.path.join(test_folder, "*.cov"))

# Infinium data
NBL_infinium_folder = "./train/NBL"
NBL_infinium_files = glob.glob(os.path.join(NBL_infinium_folder, "*.txt"))
WBC_infinium_folder = "./train/WBC_child/"
WBC_infinium_files = glob.glob(os.path.join(WBC_infinium_folder, "*.bed"))
WT_infinium_folder = "./train/WT/"
WT_infinium_files = glob.glob(os.path.join(WT_infinium_folder, "*.txt"))
Adrenal_infinium_folder = "./train/ADRENAL"
Adrenal_infinium_files = glob.glob(os.path.join(Adrenal_infinium_folder, "*.txt"))

NBLsubcat = "MYCN"

# Folder to store intermediate files
tmp_folder = "./processed/"

clusters = pd.read_csv("./CpG_clusters_b37.tsv", sep="\t", usecols=[1,2,3], skiprows=[0,1],
header=None)
clusters = clusters[[1,2,3]]
clusterFile = "CpG_clusters_b37"
clusters[0] = clusters.index

clusters.to_csv(tmp_folder + "%s.bed" % clusterFile, header=None, index=None, sep='\t', mode =
'w')
# Use empty index to later extract all the clusters from, so that every sample has the same number
of clusters
clusters = clusters.drop([0,1,2,3], axis = 1)

# Load Infinium reference file
array450k = pd.read_csv("./HumanMethylation450_15017482_v1-2.csv", dtype={"CHR": str}, header = 7,
usecols = (0,10,11,12), index_col="IllumID")
array450k = array450k.dropna()
array450k[['MAPINFO', 'Genome_Build']] = array450k[['MAPINFO', 'Genome_Build']].astype(int)
## Extract locations with genome build GRCh37
array450k = array450k[array450k['Genome_Build'] == 37]
array450k = array450k.drop(['Genome_Build'], axis = 1)
array450k[['CHR', 'MAPINFO']] = array450k[['CHR', 'MAPINFO']].astype(str)
array450k.index.name = None

## Create empty lists to fill up with samples
testMethy_list = []
testDepth_list = []
testBeta_list = []
print("Generating testfiles")
for file in test_files:
    # Get base name from file

```

```

file_name = os.path.splitext(os.path.basename(file))[0]
# From methylation percentage to methylation ratio
df = pd.read_csv(file, sep="\t", usecols=[0,1,2,3,4,5], header=None)
df[3] = df[3]/100
# Save bismark cov as bed file to process with bedtools
df.to_csv(tmp_folder + "%s.bed" % file_name , header=None, index=None, sep='\t', mode = 'w')

## Get reads per clusters
# Make a new file with the intersect of the clusters with the cov file
outfile = open(tmp_folder + '%s_intersect.bed' % file_name, 'w')
print("      Running bedtools intersect on %s.bed..." % file_name)
arg = "bedtools intersect -wb -b %s%s.bed -a %s%s.bed" % (tmp_folder, clusterFile, tmp_folder,
file_name)
arg = arg.split()
proc = subprocess.Popen(args=arg, stdout=outfile, universal_newlines=True).wait()

# The previous step shuffles the column order, so this step rearranges the column order
df = pd.read_csv(tmp_folder + '%s_intersect.bed' % file_name, sep="\t", usecols=
[6,7,8,3,4,5,9], header=None )
df = df[[6,7,8,3,4,5,9]] # chr, start, stop, beta value, count methylated, count unmethylated,
cluster number
df.to_csv(tmp_folder + "%s_reordered.bed" % file_name , header=None, index=None, sep='\t',
mode = 'w')

# Group all the rows that are within a cluster, and get the sum of the methylated and
unmethylated values. Also get the row with the CpG cluster number for future indexing.
arg = "bedtools groupby -i %s%s_reordered.bed -g 1-3,7 -c 5,6 -o sum" % (tmp_folder,
file_name)
arg = arg.split()
outfile = open(tmp_folder + '%s_clustered.bed' % file_name, 'w')
print("      Running bedtools groupby on %s.bed..." %file_name)
proc = subprocess.Popen(args=arg, stdout=outfile, universal_newlines=True).wait()

df = pd.read_csv(tmp_folder + '%s_clustered.bed' % file_name, sep="\t", header=None, index_col
= 3 )
# Remove index.name for consistence
df.index.name = None

# Get beta value per cluster
df[6] = df[4]/(df[4] + df[5])

# Reorder the columns
df = df[[0,1,2,6,4,5]] # chr, start, stop, beta value, no methylated, no unmethylated

# Sort by chromosome
df.sort_values(by=[0,1,2], inplace=True)

# Get total depth (=methylated + unmethylated count)
df[7] = df[4] + df[5]

# Mark all clusters lower than 30 reads with NA
df[[7,6,4,5]] = df[[7,6,4,5]].mask(df[7] < 30)

# Replace numpy NaN with NA string
df = df.replace(np.nan, 'NA', regex=True)

# Make a new variable for visualisation that contains the beta values of the clusters
testBeta_df = df
testBeta_df.columns = [0,1,2, "%s" % file_name, 4, 5,7]
testBeta_df = testBeta_df.drop([0,1,2,4,5,7], axis = 1).astype(str)
testBeta_list.append(testBeta_df)

# Merge list in pandas df for clustermap
testBeta = pd.concat(testBeta_list, axis = 1)
testBeta = pd.merge(clusters, testBeta, how = "left", left_index=True, right_index=True)
testBeta = testBeta.transpose().fillna('NA')

print("Generating reference")
## Function that gets the average beta value in a cluster,

```

```

## or writes NA if more than half are not available
def getAvg(x):
    if isinstance(x, float):
        return x
    elif len(x) == 0:
        x = "NA"
    else:
        line_values = []
        countNA = 0
        line_values = x.split(',')
        line_values = [i.strip(' ') for i in line_values]
        line_values = list(filter(None, line_values))
        countTot = len(line_values)
        for value in line_values:
            if value == 'NA':
                countNA = countNA + 1
        if countTot == 0:
            x = "NA"
        elif countNA/countTot >= 0.5:
            x = "NA"
        else:
            line_values_rmNA = filter(lambda a: a != 'NA', line_values)
            line_values_rmNA_list = list(line_values_rmNA)
            calcmean = np.array(line_values_rmNA_list).astype(np.float)
            x = np.mean(calcmean)
        return x

## The input for this function is ordered an infinium 450k file
## with the order chr - start - stop - beta value
def generateTrain_Infinium(label, file_name):
    # Get reads per clusters
    outfile = open(tmp_folder + "%s_intersect.bed" % file_name, 'w')
    print("    Running bedtools intersect on %s.bed..." % file_name)
    proc = subprocess.Popen(args=["bedtools", "intersect", "-b", tmp_folder + "%s.bed" %
clusterFile, "-a", tmp_folder + "%s.bed" % file_name, "-wb"], stdout=outfile,
universal_newlines=True).wait()

    df = pd.read_csv(tmp_folder + '%s_intersect.bed' % file_name, sep="\t", usecols=[6,3,4,5,7],
header=None )
    df = df[[4,5,6,3,7]]
    df[3] = df[3].replace(np.nan, 'NA', regex=True)
    df.to_csv(tmp_folder + "%s_reordered.bed" % file_name , header=None, index=None, sep='\t',
mode = 'w')

    # Group the total and methylated reads per cluster
    arg = "bedtools groupby -i %s_reordered.bed -g 1-3,5 -c 4 -o collapse" % (tmp_folder,
file_name)
    arg = arg.split()
    outfile = open(tmp_folder + '%s_clustered.bed' % file_name, 'w')
    print("    Running bedtools groupby on %s.bed..." %file_name)
    proc = subprocess.Popen(args=arg, stdout=outfile, universal_newlines=True).wait()

    df = pd.read_csv(tmp_folder + '%s_clustered.bed' % file_name, sep="\t", header=None,
index_col=3 )
    df = df[~df.index.duplicated(keep='first')]
    df.index.name = None
    df.sort_values(by=[0,1,2], inplace=True)
    df[4] = df[4].apply(getAvg)
    df.columns = [0,1,2,label]
    df = df.drop([0,1,2], axis = 1)
    return df

### Initialize empty list
trainFile_list = []

# ### Read in NBL files
## Specify files with clinical parameters
MNA = pd.read_table('./train/MNA.txt', sep='\n', header = None)
MA = pd.read_table('./train/MA.txt', header = None)

```

```

## Label the different clinical parameters
if NBLsubcat == "MYCN":
    for file in NBL_infinium_files:
        file_name = os.path.splitext(os.path.basename(file))[0]
        name = file_name.split('.')
        name = str(name[4])
        name = "-".join(name.split("-", 3)[:3])
        # Extract position and beta value
        df = pd.read_csv(file, sep="\t", usecols=[0,1,2,3,4], header=1)
        df["Genomic_Coordinate_Stop"] = df["Genomic_Coordinate"]
        df = df[["Chromosome", "Genomic_Coordinate", "Genomic_Coordinate_Stop", "Beta_value"]]
        df.sort_values(by = ["Chromosome", "Genomic_Coordinate"], inplace=True)
        df.to_csv(tmp_folder + "%s.bed" % file_name , header=None, index=None, sep='\t', mode =
'w')

        if name in MNA.values:
            df = generateTrain_Infinium(label = "nbl-mna", file_name = file_name)
            trainFile_list.append(df)
        elif name in MA.values:
            df = generateTrain_Infinium(label = "nbl-ma", file_name = file_name)
            trainFile_list.append(df)
        else:
            df = generateTrain_Infinium(label = "nbl-nos", file_name = file_name)
            trainFile_list.append(df)
else:
    for file in NBL_infinium_files:
        file_name = os.path.splitext(os.path.basename(file))[0]
        # Extract position and beta value
        df = pd.read_csv(file, sep="\t", usecols=[0,1,2,3,4], header=1)
        df["Genomic_Coordinate_Stop"] = df["Genomic_Coordinate"]
        df = df[["Chromosome", "Genomic_Coordinate", "Genomic_Coordinate_Stop", "Beta_value"]]
        df.sort_values(by = ["Chromosome", "Genomic_Coordinate"], inplace=True)
        df.to_csv(tmp_folder + "%s.bed" % file_name , header=None, index=None, sep='\t', mode =
'w')

        df = generateTrain_Infinium(label = "nbl", file_name = file_name)
        trainFile_list.append(df)

### Similar to NBL, only the column headers are different.
for file in WT_infinium_files:
    file_name = os.path.splitext(os.path.basename(file))[0]
    ## Extract position and beta value
    df = pd.read_csv(file, sep="\t", usecols=[1,2,3,4,5], header=0, dtype={"Position": str,
"Chromosome": str})
    ## Add a stop and reorder the columns
    df["Position_Stop"] = df["Position"]
    df = df[["Chromosome", "Position", "Position_Stop", "AVG_Beta"]]
    df.sort_values(by = ["Chromosome", "Position"], inplace=True)
    df = df.dropna()
    df.to_csv(tmp_folder + "%s.bed" % file_name , header=None, index=None, sep='\t', mode = 'w')

    df = generateTrain_Infinium(label = "wt", file_name = file_name)
    trainFile_list.append(df)

for file in WBC_infinium_files:
    file_name = os.path.splitext(os.path.basename(file))[0]
    ## Open the file
    df = pd.read_csv(file, sep="\t", header=None, index_col=0, names = ["Beta_Value"])
    ## Add the chromosomal position to the sample
    df = pd.merge(array450k, df, how = "inner", left_index=True, right_index=True)
    ## Add a stop and reorder the columns
    df["MAPINFO_Stop"] = df["MAPINFO"]
    df = df[["CHR", "MAPINFO", "MAPINFO_Stop", "Beta_Value"]]
    df.sort_values(by = ["CHR", "MAPINFO"], inplace=True)
    df.to_csv(tmp_folder + "%s.bed" % file_name , header=None, index=None, sep='\t', mode = 'w')

    df = generateTrain_Infinium(label = "wbc", file_name = file_name)
    trainFile_list.append(df)

```



```

for file in Adrenal_infinium_files:
    file_name = os.path.splitext(os.path.basename(file))[0]
    ## Open the file
    df = pd.read_csv(file, sep="\t", header=3, index_col=0, names = ["Beta_Value",
"Pval"]).drop("Pval", axis=1)
    ## Add the chromosomal position to the sample
    df = pd.merge(array450k, df, how = "inner", left_index=True, right_index=True)
    ## Add a stop and reorder the columns
    df["MAPINFO_Stop"] = df["MAPINFO"]
    df = df[["CHR", "MAPINFO", "MAPINFO_Stop", "Beta_Value"]]
    df.sort_values(by = ["CHR", "MAPINFO"], inplace=True)
    df.to_csv(tmp_folder + "%s.bed" % file_name , header=None, index=None, sep='\t', mode = 'w')

    df = generateTrain_Infinium(label = "adrenal", file_name = file_name)
    trainFile_list.append(df)

# Generate full matrix from list
trainFile = pd.concat(trainFile_list, axis = 1)
# Make sure that the file contains all the clusters
trainFile = pd.merge(clusters, trainFile, how = "left", left_index=True, right_index=True)
trainFile = trainFile.transpose().fillna('NA')
trainFile_rmNA = trainFile.select_dtypes(include=['float64'])
print("The number of columns in the trainfile is: %i" % trainFile.shape[1])
print("The number of columns in the trainfile after removing all NA values is: %i" %
trainFile_rmNA.shape[1])

print("Generating clustermap")

trainFile = trainFile.transpose()
testBeta = testBeta.transpose()
#TotalMatrix = trainFile
TotalMatrix = pd.merge(trainFile, testBeta, how = "left", left_index=True, right_index=True)

outputfolder = "./plots"
TotalMatrix = TotalMatrix.apply(pd.to_numeric, errors='coerce').dropna()

print("The number of remaining rows in the clustermap is %d (after removing rows containing NA
values)" % (len(TotalMatrix)))
TotalMatrix.to_csv('%s/TotalMatrix.csv' % outputfolder, sep=',', mode='w')

## Get colors for each tumor in the plot
TotalMatrix_labels = TotalMatrix.columns.unique()
TotalMatrix_pal = sns.cubehelix_palette(TotalMatrix_labels.unique().size,
light=.9, dark=.3, reverse=True,
start=1, rot=-2)
TotalMatrix_lut = dict(zip(map(str, TotalMatrix_labels.unique()), TotalMatrix_pal))
TotalMatrix_colors = pd.Series(TotalMatrix_lut)

print("Generating UMAP")
TotalMatrix = TotalMatrix.transpose()
## Extract the tumor name from the indices
TotalMatrix['tumor'] = TotalMatrix.index

import umap
X_umap = TotalMatrix.drop("tumor", axis = 1)
y_umap = TotalMatrix['tumor']

print("The number of CpGs in the UMAP-plot is: %i" % len(TotalMatrix.columns))
umap_results = umap.UMAP(n_neighbors=25, min_dist=0.5).fit_transform(X_umap)

umapDf = pd.DataFrame(data = umap_results, columns = ['UMAP 1', 'UMAP 2'])
y_umap = y_umap.values
final_umap_Df = pd.concat([umapDf, pd.DataFrame(y_umap, columns=["target"])], axis = 1)
print("Generating UMAP plots...")
fig = plt.figure(figsize = (8,8))
ax = fig.add_subplot(1,1,1)
ax.set_xlabel('UMAP 1', fontsize = 18)
ax.set_ylabel('UMAP 1', fontsize = 18)
ax.set_title('cfRRBS generates similar clinical relevant data like WGBS and SeqCapEpi', fontsize =

```

```

20)
targets = list(TotalMatrix['tumor'].unique())
targets.sort()
targets_tumor = ["adrenal", "nbl-ma", "nbl-mna", "wbc", "wt"]
targets_tumor.sort()
colors_tumor = ["#43b7ba", "#ec672e", "#8392af", "#6f706f", "#e7025f"]
targets_blood = ["NBL-MA cfRRBS", "NBL-MNA cfRRBS"]
targets_blood.sort()
colors_blood = ["#5e2912", "#1b2944"]
targets_WGBS = ["NBL-MA WGBS", "NBL-MNA WGBS"]
targets_WGBS.sort()
colors_WGBS = ["#5e2912", "#1b2944"]
targets_SeqCapEpi = ["NBL-MA SeqCapEpi", "NBL-MNA SeqCapEpi"]
targets_SeqCapEpi.sort()
colors_SeqCapEpi = ["#5e2912", "#1b2944"]
for target, color in zip(targets_tumor, colors_tumor):
    indicesToKeep = final_umap_Df['target'] == target
    print('Number of %s on UMAP plot: %d' % (target, len(final_umap_Df.loc[indicesToKeep])))
    ax.scatter(final_umap_Df.loc[indicesToKeep, 'UMAP 1']
               , final_umap_Df.loc[indicesToKeep, 'UMAP 2']
               , c = color
               , s = 30,
               label = targets_tumor)#, shade=True, shade_lowest=False)
for target, color in zip(targets_blood, colors_blood):
    indicesToKeep = final_umap_Df['target'] == target
    print('Number of %s on UMAPplot: %d' % (target, len(final_umap_Df.loc[indicesToKeep])))
    ax.scatter(final_umap_Df.loc[indicesToKeep, 'UMAP 1']
               , final_umap_Df.loc[indicesToKeep, 'UMAP 2']
               , c = color
               , s = 30
               , marker = 'X',
               label = targets_blood)
for target, color in zip(targets_WGBS, colors_WGBS):
    indicesToKeep = final_umap_Df['target'] == target
    print('Number of %s on UMAP plot: %d' % (target, len(final_umap_Df.loc[indicesToKeep])))
    ax.scatter(final_umap_Df.loc[indicesToKeep, 'UMAP 1']
               , final_umap_Df.loc[indicesToKeep, 'UMAP 2']
               , c = color
               , s = 30
               , marker = 's',
               label = targets_WGBS)
for target, color in zip(targets_SeqCapEpi, colors_SeqCapEpi):
    indicesToKeep = final_umap_Df['target'] == target
    print('Number of %s on UMAP plot: %d' % (target, len(final_umap_Df.loc[indicesToKeep])))
    ax.scatter(final_umap_Df.loc[indicesToKeep, 'UMAP 1']
               , final_umap_Df.loc[indicesToKeep, 'UMAP 2']
               , c = color
               , marker = 'v',)
legend_labels = targets_tumor + targets_blood + targets_WGBS + targets_SeqCapEpi
legend_labels = ", ".join(legend_labels)
legend_labels = legend_labels.split(",")
ax.legend(legend_labels, fontsize = 16, bbox_to_anchor=(1.04,1), loc="upper left", ncol=1,
fancybox=True)
ax.grid(False)
fig.show()
fig.savefig('%s/UMAPplot.svg' % (outputfolder), dpi = 300, bbox_inches="tight")
fig.savefig('%s/UMAPplot.png' % (outputfolder), dpi = 300, bbox_inches="tight")
print("Done")

```
